# Supplementary material for: Desymmetric hydrolysis of prochiral imide for S-pregabalin synthesis by rationally designed d-hydantoinase
Source: Royal Society of Chemistry journal article supplement (doi:10.1039/d2gc00728b), 2022-01-01
Supplement: d2gc00728b1.pdf [file d2gc00728b1.pdf]

## Supplementary Information

### **Desymmetric Hydrolysis of Prochiral Imide for *S*-Pregabalin Synthesis by Rationally Designed D-Hydantoinase**

Feixia Liu<sup>a†</sup>, Jie Ren<sup>b†</sup>, Lu Guo<sup>c</sup>, Yang Liu<sup>a,d</sup>, Defeng Li<sup>c</sup>, Bo Yu<sup>a\*</sup>

*<sup>a</sup> CAS Key Laboratory of Microbial Physiological & Metabolic Engineering, State Key Laboratory of Mycology, Institute of Microbiology, Chinese Academy of Sciences, Beijing 100101, China*

*<sup>b</sup> State Key Laboratory for Biology of Plant Diseases and Insect Pests, Institute of Plant Protection, Chinese Academy of Agricultural Sciences, Beijing 100029, China*

*<sup>c</sup> State Key Laboratory of Microbial Resources, Institute of Microbiology, Chinese Academy of Sciences, Beijing 100101, PR China*

*<sup>d</sup> University of Chinese Academy of Sciences, Beijing 100049, China*

† F.L. and J.R. contributed equally to this study.

\* Corresponding author.

E-mail: [yub@im.ac.cn](mailto:yub@im.ac.cn) (B. Yu)

Phone/Fax: +86-10-64806132

ORCID: [0000-0003-3148-0986](https://orcid.org/0000-0003-3148-0986)

**Fig. S1** Activity tests towards 3-isobutyl glutarimide by selected imidasases.

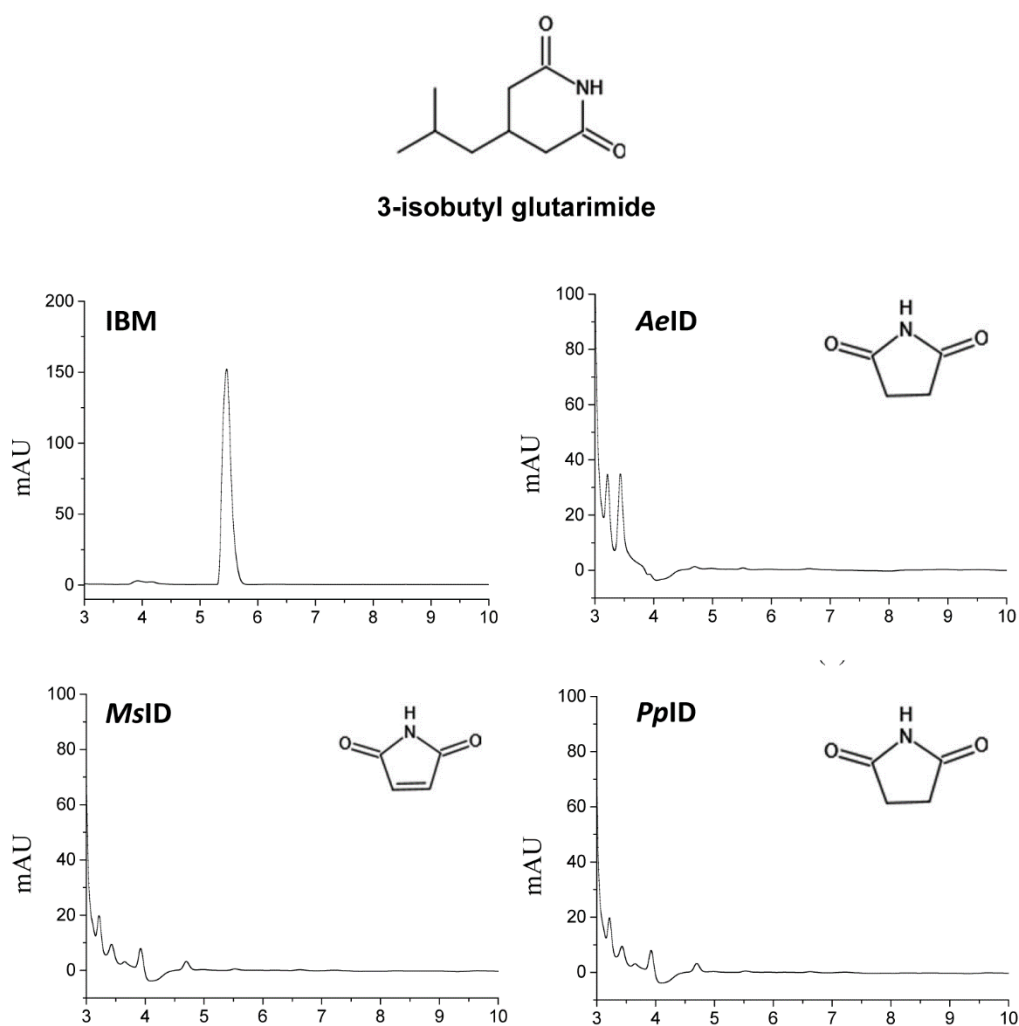

IBM, the standard of target product 3-isobutyl glutaric acid monoamide; *AeID*, the imidasase gene from *Alcaligenes eutrophus* 112R4 (GenBank No. AAK53437.1); *MsID*, imidasase gene from *Mycolicibacterium smegmatis* (GenBank No. WP\_011727598.1) and *PpID*, imidasase gene from *Pseudomonas putida* YZ-26 (GenBank No. AAY98498.1). The natural substrate structures of the selected enzymes were shown in the respective figures. The target substrate structure in this study, 3-isobutyl glutarimide, was also indicated.

**Fig. S2** Activity test towards 3-isobutyl glutarimide by D-hydantoinase from *Bacillus stearothermophilus* SD-1.

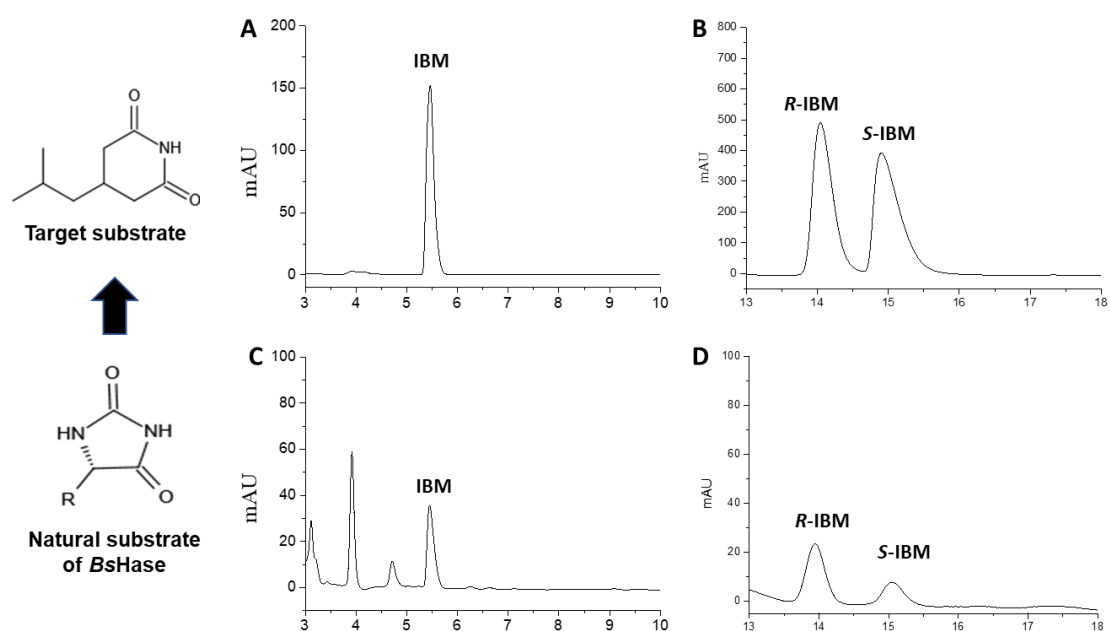

(A) HPLC spectrum of standard of 3-isobutyl glutaric acid monoamide (IBM) analyzed by C18 column; (B) spectrum of standards of *R*-IBM and *S*-IBM analyzed by Chiralpak AD-H column; (C) product from 3-isobutyl glutarimide catalyzed by wide-type D-hydantoinase from *Bacillus stearothermophilus* SD-1 (*BsHase*) (GenBank No. QFU78355.1); (D) the chirality of produced IBM by wild-type *BsHase*.

**Fig. S3** Michaelis-Menten-plots for the reaction of the wild-type and the mutants.

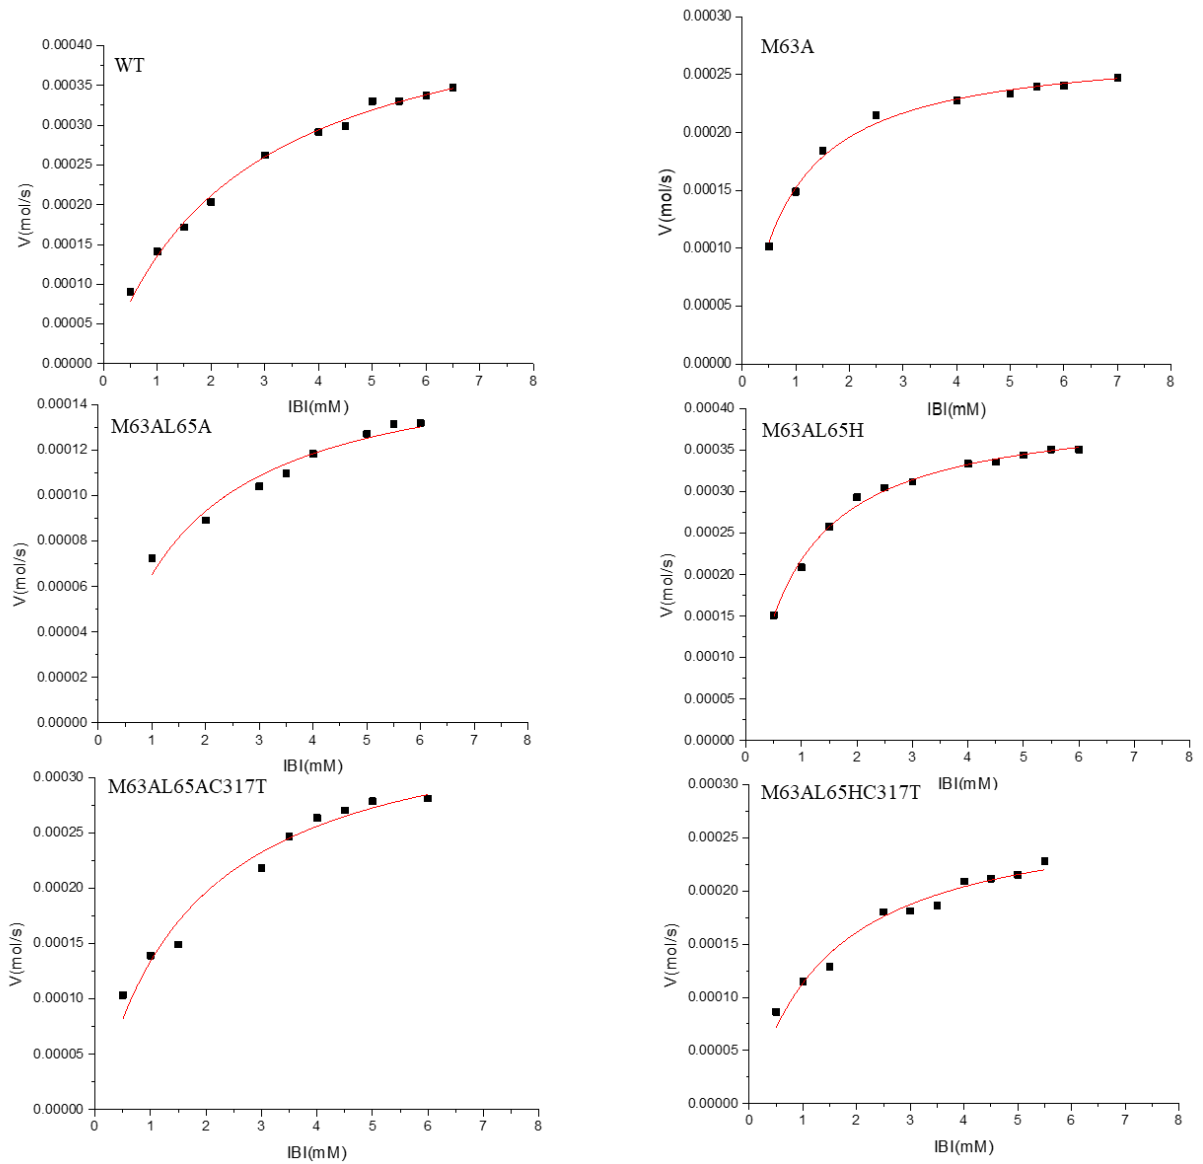

**Fig. S4** The chirality of produced *R*-IBM by engineered *BsHase* with triple mutation (M63AL65HC137T).

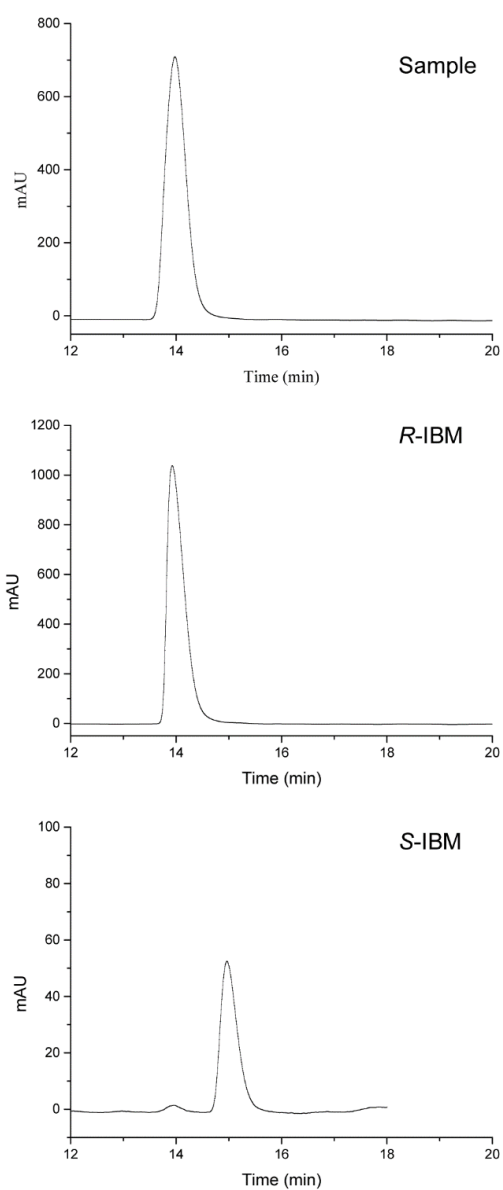

Sample, HPLC analysis spectrum of *R*-IBM product in the broth;  
*R*-IBM and *S*-IBM, the standards.

**Fig. S5** Mass spectrometry analysis of produce *R*-IBM.

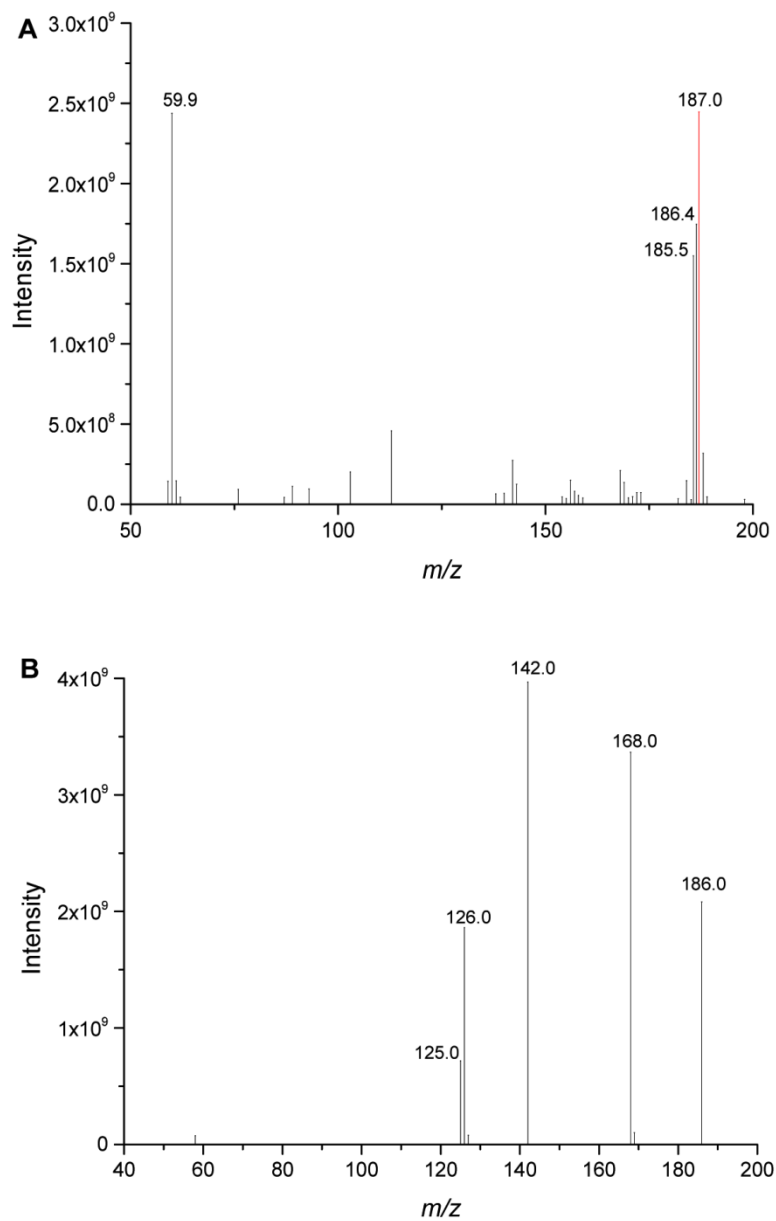

(A) Calculated value for *R*-IBM  $[M-H]^-$  form (negative mode) was  $m/z$  187.

(B) MS-MS spectra for *R*-IBM.

**Fig. S6**  $^1\text{H}$  NMR spectrum of purified *R*-IBM.

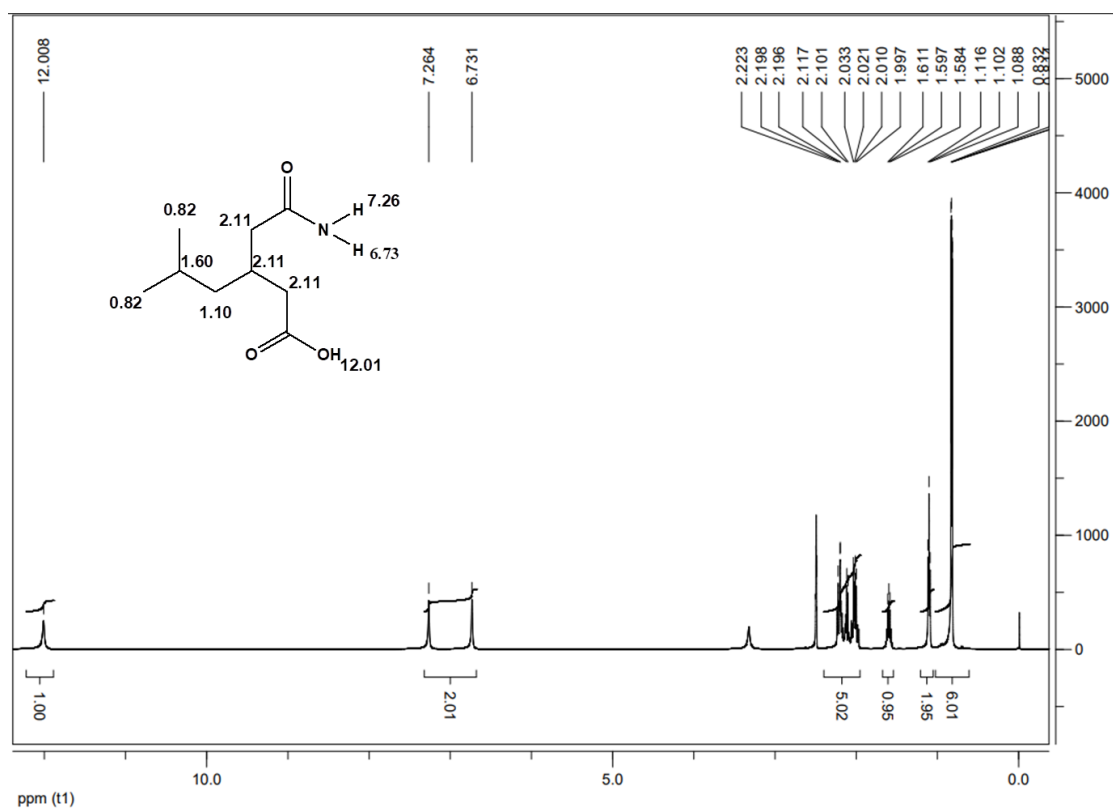

(DMSO- $\text{D}_6$ ),  $\delta$ :. 0.82 (dd, 6H,  $^2J_{\text{H-H}}=7.8$  Hz,  $^3J_{\text{H-H}}=3.6$  Hz), 1.10 (t, 2H,  $^2J_{\text{H-H}}=8.4$  Hz,  $^3J_{\text{H-H}}=8.4$  Hz), 1.60 (m, 1H,  $^3J_{\text{H-H}}=8.4$  Hz), 2.11 (m, 5H,  $^2J_{\text{H-H}}=13.8$  Hz,  $^3J_{\text{H-H}}=7.8$  Hz), 6.73 (s, 1H), 7.26 (s, 1H), 12.01 (s, 1H).

**Fig. S7** HPLC spectrum of *S*-pregabalin prepared from *R*-IBM obtained in this study.

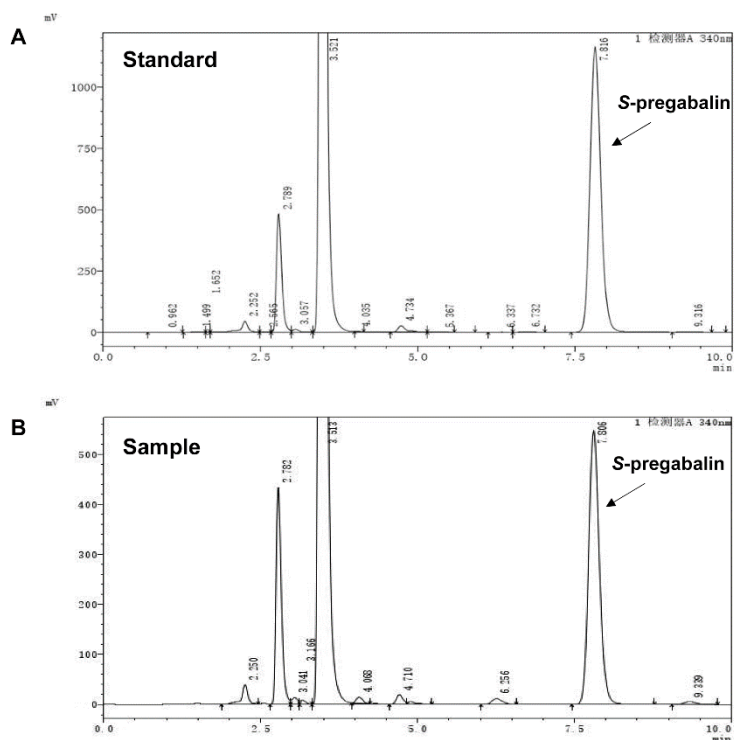

(A) The authentic standard of commercial *S*-pregabalin;

(B) The *S*-pregabalin sample prepared from the *R*-IBM obtained in this study.

The peak at retention time of 7.81 min is *S*-pregabalin derivatized with 1-fluoro-2,4-dinitrophenyl-5-L-alanine amide (FDAA) and the peaks at 2.78 and 3.52 min are from the derivative reagent of FDAA.



## **Experimental**

### **1. Genes and materials**

Genes from *Bacillus stearothermophilus* SD-1 (GenBank No. QFU78355.1), *Alcaligenes eutrophus* 112R4 (GenBank No. AAK53437.1), *Mycobacterium smegmatis* (GenBank No. WP\_011727598.1), *Pseudomonas putida* YZ-26 (GenBank No. AAY98498.1) were synthesized with optimized codons based on *E. coli* expression preference (GenScript Co., Ltd, China). *E. coli* BL21(DE3) was used as expression host and *E. coli* TOP10 was used as cloning hosts. The PCR and seamless cloning kit was purchased by Vazyme Biotech Co., Ltd., China. 3-Isobutyl glutarimide (IBI), *R*-3-isobutyl glutaric acid monoamide (*R*-IBM), *S*-IBM and the other reagents used were analytic grade and commercially available.

### **2. Screening for imide hydrolases**

Four candidate genes were synthesized and subcloned into plasmid pET-28a and transformed into *E. coli* BL21(DE3). The recombinant strains were cultured at 37 °C and 200 rpm in Luria-Bertani (LB) medium supplemented with a final concentration of 40 µg·mL<sup>-1</sup> kanamycin, then were induced by 0.5 mM IPTG at 24 °C for 12 h when OD 600 nm reached at 0.6 to 0.8. The whole cells were harvested by centrifugation at 5000 × g for 10 min at 4 °C and washed twice with 50 mM Tris-HCl buffer (pH 7.5). The whole cell reaction system which contains 10 mM IBI, 7.25 g/DCW (dry cell weight) in 50 mM Tris-HCl buffer (pH 7.5) was taken for initial screening process.

### **3. Molecular docking**

The X-ray crystal structure of *B. stearothermophilus* D-hydantoinase was retrieved

from the protein data bank (PDB) with the entry code 1k1d. Superimposition was then carried out between 1k1d and the crystal structure of hydantoins from *Bacillus* sp. AR9 (PDB code: 1yny). The conserved water molecule of the di-zinc center that existed in 1yny was extracted to the corresponding active site of *B. stearothermophilus* D-hydantoinase to generate the protein model using PyMol. Wild-type and mutant models were pretreated by running Lepro, the zinc and conserved water atoms were retained. A three-dimensional (3D) structure of IBI was created by Chem3D software and free energy minimization was generated by the MMFF94 program. Docking IBI to D-hydantoinase and mutant were performed using Ledock. The di-zinc center in the crystal structure was set as the center of the enclosing box ( $25 \text{ \AA} \times 25 \text{ \AA} \times 24 \text{ \AA}$ ) using the GetBox plugin in PyMOL.

#### **4. Construction and selection of site-point mutagenesis libraries**

The saturation mutagenesis libraries were incorporated by an overlapping PCR method using complementary oligonucleotides with plasmid pTrac99a contain target gene as template. The DNA fragments were digested with *DpnI* and transformed into *E. coli* TOP10 after purification. The recombinant strains were cultured and reacted as mentioned above.

#### **5. Purification of candidate protein**

The wild type and the chosen mutations were subcloned into plasmid pET-28a and transformed into *E. coli* BL21(DE3). The cells were cultivated and harvested as described above and disrupted by sonication. The supernatant was obtained after centrifugation at  $13,000 \times g$  for 15 min and purified through Ni-chelating affinity chromatography. Proteins were identified by sodium dodecyl sulfate-polyacrylamide

gel electrophoresis (SDS-PAGE), and quantified by Bradford method<sup>1</sup>.

## **6. Activity and kinetic assay**

The standard enzyme-assay mixture contained 50 mM Tris/HCl buffer (pH 7.5), 5 mmol IBI, 1 mM Mn<sup>2+</sup> and 1-10 µg enzyme in 100 µL reaction system. The reaction was stopped with 2 µL HCl after incubation. One unit enzyme activity is defined as the amount of enzyme that catalyzed the production of 1 µmol IBM in 1 min under the appropriate assay conditions. The specific activity was defined as the amount of IBM produced per min per mg protein. Kinetic constants were determined from Lineweaver-Burk plot assuming Michaelis-Menten kinetics.

## **7. Fermentation and transformation**

A single colony of the chosen mutant was inoculated in LB medium and cultivated at 37°C and 200 rpm for about 6-8 h, and then transferred to fresh LB medium at 2 % (v/v) inoculum dose and cultivated as the seed culture. The 5 L fermenter containing 3 L of sterilized CD (Chemical Determination) medium was sterilized and transferred with seed culture at an initial concentration of about 0.15-0.2 (OD<sub>600</sub>)<sup>2</sup>. The fermentation process was carried out at 37°C until OD<sub>600</sub> reached 30, then temperature shifted to 30°C after 0.2 mM IPTG was added for about 24 h. During the whole protein induction process, the pH was controlled at 7.5 using ammonia and DO value at 30% with glucose supplement rate at 5 g/L/h<sup>3</sup>.

The cells were harvested and resuspended into the reaction buffer include 500 mM IBI, 20 g/L glucose, 5 mM Mn<sup>2+</sup> and 18 g/DCW whole cell. The reaction process was carried at 50 °C and pH was controlled at 7.5 using NaOH. Samples were taken every 2 hours for HPLC detection.

## 8. Synthesis of *S*-PGB from experimentally prepared *R*-IBM in this study

*R*-IBM (3.0 g) was first dissolved in 5.0 M NaOH (3.5 mL). In a separate flask, bromine (3.06 g) was added to 5.0 M NaOH (11.0 mL) with dropwise in ice bath. Then the bromine solution was added to the *R*-IBM solution dropwise, and heated to 80 °C for 2 h. Then hydrochloric acid solution was added to adjust pH to 5.0, cooled in ice bath, filtered and the solid was wash with water, dried to give 2.4 g *S*-PGB with a final yield of 93.8%.

## 9. Analytic methods

For testing of IBI and IBM, the procedures are as follows: HPLC (Agilent 1260) equipped with a C18 column (Agilent XDB-C18, 4.6×250 mm, 5 μm) at flow rate of 1 mL/min, the column temperature was 30°C, the absorbance was set at 210 nm; solvent A was dipotassium phosphate (20 mM, pH 3.0) and solvent B was acetonitrile, the elution profile was that 0-20 min 20% B, 20-30 min 40% B, 30-35 min 40% B, 35-40 min 20% B, 40-45 min 20% B. The chirality of IBM was analysis with Chiralpak AD-H column (250 × 4.6 mm, 5 μm), at flow rate of 0.5 mL/min, the column temperature was 35 °C, the absorbance was set at 210 nm; TFA (0.1% (v/v)) in *n*-hexane and ethanol (supplied with 0.15% (v/v) TFA) were employed as mobile phases at ratio of 88:12. *S*-PGB derivatized with Marfey's reagent was detected by HPLC with the same C18 column at 340 nm. In brief, 400 μL of 1 mol/L 1-fluoro-2-4-dinitrophenyl-5-L-alanine amide (FDAA) acetone solution was mixed with 40 μL of 1 mol/L NaHCO<sub>3</sub> solution and 100 μL *S*-PGB sample. The mixture was reacted at 40 °C for 1 h, and then 10 μL of 2 mol/L hydrochloric acid solution was added. The derivatives were analyzed at a flow rate of 0.6 mL/min, with a mobile phase of 0.5% triethylamine solution (pH 3.0) and acetonitrile with a ratio of 55:45.

## 10. The investigated gene sequences and recombinant plasmid maps

### *AeID* (GenBank No. AAK53437.1)

ATGAGCAAGGACATACAGATCACGTTTGGCGTGGACGTCGATGCCGTCGGC  
 GGCTGGCTCGGCTCGTATGGCGGGGAGGACTCGCCCACGACATCTCGCG  
 CGGCATGTTTCGCGGGCGAGGTCGGCTCGCTGCGGCTGCTCAGGCTGTTCCG  
 ACAAATACGGCCTCAAGACCACCTGGTTCATCCCGGGCCACTCCGCCGAG  
 ACCTTTCCCGAGCAGATGAAGGCCGTTGGTGGACGCGGGCCATGAGATCGG  
 CATCCACGGCTACAGCCACGAGAACCCGATTGCCATGACGCCCAGCAGG  
 AGGAAGCGGTGCTCGACCGCAGCATCGAGGTCATCACGCGGCTGGCCGGC  
 CGCGTACCCACGGGCTATGTGGCGCCCTGGTGGGAGTTCAGCCCCGTCACC  
 AACGAGCTGCTGCTCAAGAAAGGCATCAAGTACGACCACAGCCTGATGCA  
 CAACGACTTCCACCCGTAACGTCGCGGTGGGCGACCAAGTGGACCCGCA  
 TCGACTACAACAAGCATCCCGACACCTGGATGAAGCCCCTGGTGC GCGGA  
 AAGGAAACGCGGCTGGTTCGAGATCCCCGCCAACTGGTACCTGGACGACCT  
 GCCGCCCATGATGTTTCATCAAGAAGTCGCCAACAGCCACGGCTTCGTCAA  
 CCCGCGCGACATAGAGCAGATGTGGCGCGACCAAGTTCGACTGGGTCTACC  
 GCGAGCACGACTACGCGGTCTTCCCATCACCATCCACCCCGATGTCTCCG  
 GCCGCCCCCAGGTGCTGCTGATGCTGGAGCGCCTGATCGAGCATTTCAGT  
 CGCACGACGGCGTGCCTTCATGACGTGCGACCAGATCGCCGACGACTTC  
 CTGCGCCGCCAGCCGCGTTAA

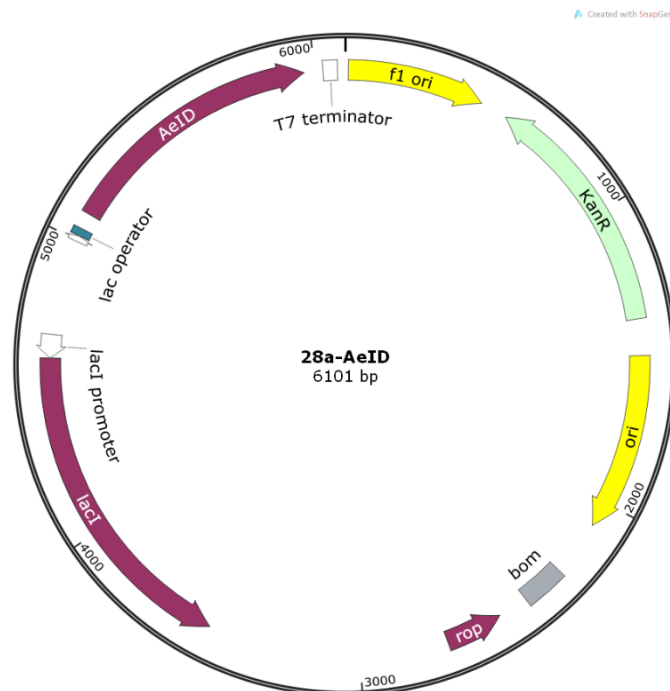

### *MsID* (GenBank No. WP\_011727598.1)

ATGACCGACAAAAAATCCAGGTTTGC GTTGGTATCGACGTTGACTCTTGC  
 GCTGGTTGGCTGGGTTCTTACGGTGGTCAGGACTCTCCGAACGACATGCAG  
 CGTGGTGTTTTCGCTGGTGAAGTTGGTGTTCGCGTATGCTGAAACTGCTG

GAACGTCGTGGTATCGTTTCTACCTGGTTCTGGCCGGGTCACTCTATCGAAA  
 CCTTCCCGACCCAGGCTAAAATGTGCGTTGACGCTGGTCACGAAATCGGTG  
 CTCACGGTTACTCTCACGAAAACCCGCGTTCTCTGTCTCAGGAACAGGAAC  
 GTGCTGTTATGGCTAAATCTGTTGAACTGGTTGAAACAGCTGACCGGTGCTC  
 GTCCGAAAGGTTACGTTGCTCCGTGGTGGGAAATGTCTGAACACACCGCTA  
 CCATCCTGAAAGAATACGACTTCTCTTACGACCACTCTCAGAACTACAACG  
 ACTTCGTTCCGTTCTACGCTCGTGTGGTGACGAATGGACCCCGATCGACA  
 CCACCAAACCGGCTGAACTGGATGAAACCGCTGAAACACGGTCACGAA  
 ATCGACCTGGTTGAATTCTGCGGTAAGTGGTACGTTGACGACCTGCCGCCG  
 ATGATGTTTCAACAAAGGTCACGCTAACTCTCACGGTTTCGTTAACCCGCGT  
 GACATCGAACAGATGTGGAACGACCAAGTTCGACTGGGTTTACCGTGAAC  
 GGACTACGCTGTTATCCCGATGACCCTGCACCCGGACGTTTCTGGTTCGTC  
 GCAGGTTCTGCTGATGCTGGAACGTCTGCTGGACCGTTGGGCTGGTTTCGA  
 CCGTGTGTAATTCGTTACCATGGCTGACGCTGCTGAACAGTTCCGTTCTCG  
 TTACCCGCTGGACCAGCCGACCCGTCCGGAATGCGTTGGTTCGTTAA

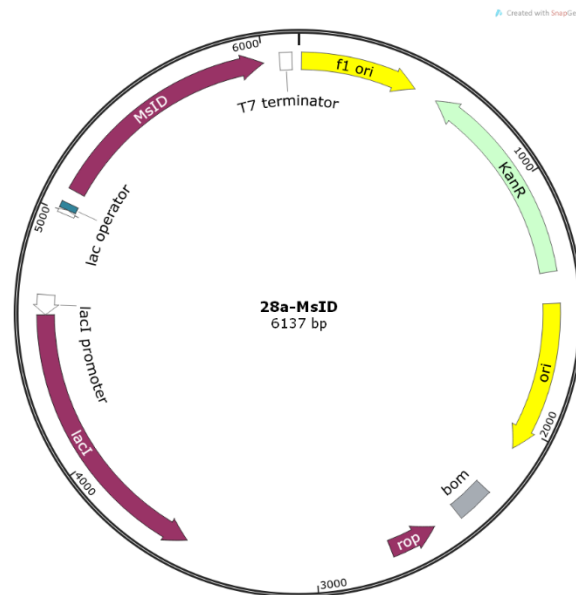

*PpID* (GenBank No. AAY98498.1).

ATGGCTAAAGAAATCCTGTGCTCTTTCGGTATCGACGTTGACGCTGTTGCTG  
 GTTGGCTGGGTTCTTACGGTGGTGAAGACTCTCCGGACGACATCTCTCGTG  
 GTCTGTTTCGCTGGTGAAGTTGGTTCTCCGCGTCTGCTGAAACTGTTCGAAC  
 GTTTCGGTATCAAACCACCTGGTTCATCCCGGGTCACTCTATCGAAACCTT  
 CCCGGAACAGATGCAGGCTGTTGCTGACGCTGGTCACGAAATCGGTATCCA  
 CGGTTACACCCACGAAAACCCGATCGCTATGACCCGTGAACAGGAAACCG  
 CTGTTCTGGACAAATGCATCGACCTGGTTACCAAACACTGTCTGGTAAACGTC  
 CGACCGGTTACGTTGCTCCGTGGTGGGAAATCTCTAACGTTACCAACGAAC  
 TGCTGCTGGAACGTGGTATCAAATACGACCACTCTCTGATGCACAACGACT  
 TCACCCCGTACTACGTTTCGTGTGGTGACAAATGGACCAAATCGACTACT  
 CTA AAAAACCGTCTGACTGGATGGTTCCGCTGACCCGTGGTAAAGAAACC  
 GACCTGATCGAAATCCCGGCTTCTTGGTACCTGGACGACCTGCCGCCGATG  
 ATGTTTCAAAAAATCTCCGAACTCTCACGGTTTCGTTAACCCGCACGAC

ATCGAACAGATCTGGCGTGACCAGTTCGACTGGGTTTACCGTGAAATGGAC  
TACGCTGTTTTCCCGATCACCATCCACCCGGACGTTGCTGGTCGTCCGCAG  
GTTCTGATGATGCTGGAACGTCTGTACGCTCACATGATCAAACACCCGGGT  
GTAAATTCGTTACCATGAACGAAATCGCTGACGACTTCGCTAAACGTTTCC  
CGCGTAAAAAATAA

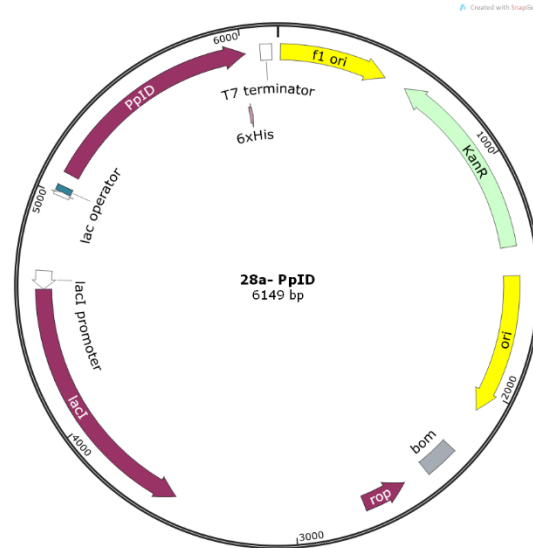

BsHase (GenBank No. QFU78355.1)

ATGACCAAATTATTAATAAATGGTACCATCGTTACCGCCACCGATACCTATG  
AAGCCCATCTGCTGATTAAAGATGGTAAAATTGCAATGATTGGCCAGAATCT  
GGAAGAAAAGGTGCCGAAGTTATTGATGCGAAAGGCTGTTATGTGTTTCC  
GGGCGGTATTGATCCGCATACCCATCTGGATATGCCTCTGGGTGGTACCGTG  
ACCAAAGATGATTTTGAATCAGGTACCATTGCCGCCGCGTTTGGCGGTACC  
ACCACCATTATTGATTTTTGCCTGACCAATAAAGGTGAACCGCTGAAAAAA  
GCAATTGAAACCTGGCATAATAAAGCCAATGGCAAAGCGGTGATCGATTAT  
GGTTTTTCATCTGATGATTAGTGAAATTACTGATGATGTTTTAGAAGAACTGC  
CGAAAGTTCTTGAAGAAGAAGGTATTACCTCACTGAAAGTGTTTATGGCGT  
ATAAAAATGTTTTCAGGCTGATGATGGTACCCTGTATTGCACCCTGCTGGCC  
GCAAAGAAGTGGGTGCCCTGGTATGGTGCATGCCGAAAACGGTGATGT  
TATTGATTATCTGACGAAAAAGCACTGGCAGATGGTAATACCGATCCGATC  
TATCATGCGCTGACCCGTCCGCCGAACTGGAAGGTGAAGCTACAGGTCCG  
CGCATGCCAGCTGACAGAACTGGCAGGCTCACAGCTGTATGTGGTGCATGT  
GACATGTGCCAGGCCGTGGAAAAAATTGCGGAAGCGCGCAATAAAGGTC  
TGGATGTTTGGGGCGAAACCTGCCCGCAGTATTTAGTTCTGGATCAGAGCT  
ATCTGAAAAACCAAATTTTGAAGGTGCAAAATATGTGTGGAGTCCGCCGC  
TGCGCGAAAAATGGCATCAGGAAGTTCTGTGGAATGCGCTGAAAAATGGT  
CAGCTGCAGACCCTGGGTAGTGATCAGTGATGTTTGGATTTTAAAGGTCAG  
AAAGAACTGGGACGTGGTATTACCAAATTCGAATGGTGGTCCGATT  
ATTGAAGATCGTGTGAGTATTCTGTTTACGGAAGGTGTTAAAAAAGGTCGC  
ATTACCCTGAACCAGTTTGTGATATTGTGAGCACCCGCATTGCAAACTGT  
TTGGCCTGTTTCCGAAAAAAGGCACCATTGTTGTGGGTAGCGATGCGGATC  
TGGTGATTTTTGATCCGAATATTGAACGTGTGATTAGTGCCGAAACACATCA  
TATGGCCGTTGATTATAATGCGTTTGAAGGCATGAAAGTGACCGGTGAACC

GGTGAGCGTTCTGTGTCGTGGTGAATTTGTGGTGCGTGATAAACAGTTTGT  
 TGGCAAACCGGGTTATGGTCAGTATCTGAAACGCGCGAAATATGGCACCAG  
 CACCATTAGTAAACAGAGCGAAGAAGTACCATTAA

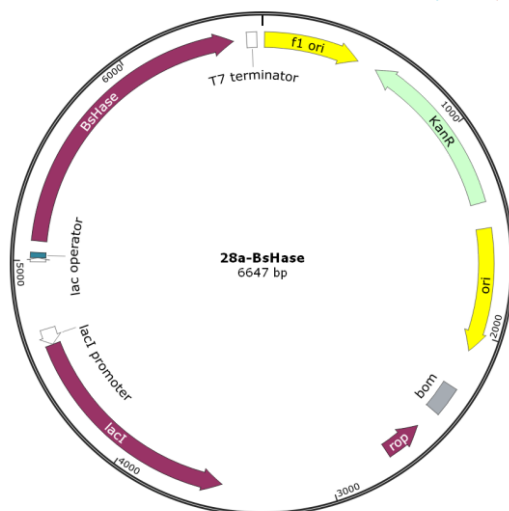

## References

1. Kruger, N. J., The Bradford method for protein quantitation. *Methods Mol Biol. (Clifton, N.J.)* **1994**, *32*, 9-15.
2. Mu, Q. X., Zhang, S. S., Mao, X. J., Tao, Y., Yu, B., Highly efficient production of L-homoserine in *Escherichia coli* by engineering a redox balance route. *Metab Eng.* **2021**, *67*, 321-329.
3. Tao, Y.; Cheng, Q.; Kopatsis, A. D., Metabolic engineering for acetate control in large scale fermentation. *Methods Mol Biol. (Clifton, N.J.)* **2012**, *834*, 283-303.
